# Supplementary material
Source: publisher figshare collection journal article supplement (https://rs.figshare.com/ndownloader/files/13292513)
Supplement: Supplementary file 1 [file 13292513]

## Sheet: Abiotics
Date	Time	Observers	Tank	Salt Type	Concentration	Tolerance	Temperature (degrees C)	DO (mg O2/L)	Conductivity (uS/cm)	pH
2016-06-28	8am	JN, JR, SC	1	CaCl	High	1000	21.5	3.45	3676	7.32
2016-06-28	8am	JN, JR, SC	2	CaCl	High	250	21.5	2.92	3621	7.2
2016-06-28	8am	JN, JR, SC	3	NaCl	High	1000	21.5	3.61	4617	7.26
2016-06-28	8am	JN, JR, SC	4	MgCl	Moderate	1000	21.6	3.04	966	7.43
2016-06-28	8am	JN, JR, SC	5	NaCl	High	250	21.8	3.16	4640	7.11
2016-06-28	8am	JN, JR, SC	6	None	Control	Naive	21.8	3.22	209.9	7.2
2016-06-28	8am	JN, JR, SC	7	None	Control	1000	21.9	3.04	218	7.21
2016-06-28	8am	JN, JR, SC	8	CaCl	Moderate	250	21.8	2.75	1555	7.34
2016-06-28	8am	JN, JR, SC	9	CaCl	Moderate	1000	21.4	2.84	1583	7.43
2016-06-28	8am	JN, JR, SC	10	CaCl	High	Naive	21.7	3.69	3777	6.76
2016-06-28	8am	JN, JR, SC	11	NaCl	Moderate	Naive	21.9	3.01	1926	7.22
2016-06-28	8am	JN, JR, SC	12	CaCl	High	250	21.3	4.39	3747	7.1
2016-06-28	8am	JN, JR, SC	13	CaCl	Moderate	Naive	22	3.16	1540	6.99
2016-06-28	8am	JN, JR, SC	14	CaCl	Moderate	250	21.5	3.22	1534	7.3
2016-06-28	8am	JN, JR, SC	15	None	Control	1000	21.7	2.9	223.3	7.23
2016-06-28	8am	JN, JR, SC	16	NaCl	High	Naive	21.8	2.76	4668	7.04
2016-06-28	8am	JN, JR, SC	17	CaCl	High	1000	21.4	3.12	3829	7.15
2016-06-28	8am	JN, JR, SC	18	MgCl	Moderate	Naive	22.1	4.28	1014	7.28
2016-06-28	8am	JN, JR, SC	19	NaCl	Moderate	250	21.4	2.45	1842	7.35
2016-06-28	8am	JN, JR, SC	20	NaCl	Moderate	Naive	21.8	2.37	1899	7.34
2016-06-28	8am	JN, JR, SC	21	CaCl	High	250	21.6	3.68	3789	7.04
2016-06-28	8am	JN, JR, SC	22	NaCl	Moderate	1000	21.5	2.54	1873	7.58
2016-06-28	8am	JN, JR, SC	23	MgCl	Moderate	250	22.2	2.43	1013	7.24
2016-06-28	8am	JN, JR, SC	24	NaCl	Moderate	1000	21.6	2.09	1867	7.49
2016-06-28	8am	JN, JR, SC	25	NaCl	High	250	21.9	5.15	3846	7.43
2016-06-28	8am	JN, JR, SC	26	CaCl	High	1000	22.5	3.99	3697	6.82
2016-06-28	8am	JN, JR, SC	27	NaCl	High	Naive	22.3	3.95	4027	7.07
2016-06-28	8am	JN, JR, SC	28	MgCl	High	1000	21.9	3.53	2219	7.23
2016-06-28	8am	JN, JR, SC	29	CaCl	Moderate	Naive	21.9	3.32	1583	6.96
2016-06-28	8am	JN, JR, SC	30	MgCl	High	1000	21.8	3.15	2274	7.21
2016-06-28	8am	JN, JR, SC	31	None	Control	Naive	21.8	3.33	211.9	7.26
2016-06-28	8am	JN, JR, SC	32	NaCl	High	Naive	22	2.39	4665	7.08
2016-06-28	8am	JN, JR, SC	33	None	Control	250	22.4	2.32	214.9	7.44
2016-06-28	8am	JN, JR, SC	34	None	Control	250	22.4	2.16	217.9	7.25
2016-06-28	8am	JN, JR, SC	35	MgCl	Moderate	250	22.4	4.43	988	7.23
2016-06-28	8am	JN, JR, SC	36	CaCl	Moderate	250	21.6	3.89	1539	7.28
2016-06-28	8am	JN, JR, SC	37	CaCl	High	Naive	21.8	4.3	3791	6.78
2016-06-28	8am	JN, JR, SC	38	None	Control	250	22.2	2.35	219.8	7.2
2016-06-28	8am	JN, JR, SC	39	NaCl	High	1000	21.4	3.52	4485	7.28
2016-06-28	8am	JN, JR, SC	40	MgCl	High	Naive	21.9	2.56	2353	7.06
2016-06-28	8am	JN, JR, SC	41	CaCl	Moderate	1000	22.2	3.66	1586	7.02
2016-06-28	8am	JN, JR, SC	42	None	Control	Naive	21.8	3.53	207.1	7.22
2016-06-28	8am	JN, JR, SC	43	CaCl	High	1000	21.4	5.91	3699	7.16
2016-06-28	8am	JN, JR, SC	44	MgCl	Moderate	1000	21.7	2.79	985	7.33
2016-06-28	8am	JN, JR, SC	45	MgCl	High	1000	21.6	3.53	2273	7.15
2016-06-28	8am	JN, JR, SC	46	MgCl	High	250	22.4	3.8	2317	7.05
2016-06-28	8am	JN, JR, SC	47	MgCl	Moderate	250	22.4	2.55	1017	7.19
2016-06-28	8am	JN, JR, SC	48	MgCl	High	Naive	22.2	3.19	2311	7.09
2016-06-28	8am	JN, JR, SC	49	MgCl	High	250	22.4	1.92	2315	7.01
2016-06-28	8am	JN, JR, SC	50	NaCl	Moderate	Naive	22.2	2.19	1891	7.27
2016-06-28	8am	JN, JR, SC	51	MgCl	Moderate	Naive	22.3	2.43	979	7.25
2016-06-28	8am	JN, JR, SC	52	CaCl	Moderate	250	21.7	2.87	1559	7.23
2016-06-28	8am	JN, JR, SC	53	NaCl	Moderate	Naive	22.1	3.76	1892	7.21
2016-06-28	8am	JN, JR, SC	54	MgCl	Moderate	Naive	22.1	2.65	1016	7.21
2016-06-28	8am	JN, JR, SC	55	None	Control	250	22.4	3.68	206	7.2
2016-06-28	8am	JN, JR, SC	56	NaCl	High	250	21.6	3.31	4775	7.14
2016-06-28	8am	JN, JR, SC	57	NaCl	High	Naive	21.8	5.7	3645	7.13
2016-06-28	8am	JN, JR, SC	58	CaCl	High	Naive	21.8	4.03	3820	6.81
2016-06-28	8am	JN, JR, SC	59	NaCl	Moderate	1000	21.6	3.37	1888	7.39
2016-06-28	8am	JN, JR, SC	60	CaCl	Moderate	Naive	22.3	3.48	1597	6.93
2016-06-28	8am	JN, JR, SC	61	None	Control	1000	21.9	3.48	217.5	7.22
2016-06-28	8am	JN, JR, SC	62	NaCl	Moderate	250	21.9	2.96	1923	7.38
2016-06-28	8am	JN, JR, SC	63	NaCl	Moderate	250	21.9	3.64	1860	7.3
2016-06-28	8am	JN, JR, SC	64	CaCl	Moderate	Naive	22.2	3.21	1515	7.01
2016-06-28	8am	JN, JR, SC	65	MgCl	High	Naive	22.1	3.8	2289	7.04
2016-06-28	8am	JN, JR, SC	66	None	Control	1000	21	3.44	212	7.19
2016-06-28	8am	JN, JR, SC	67	MgCl	High	Naive	22.3	3.18	2257	7.06
2016-06-28	8am	JN, JR, SC	68	NaCl	High	1000	21.8	4.7	3960	7.19
2016-06-28	8am	JN, JR, SC	69	MgCl	Moderate	1000	21.9	2.53	1004	7.27
2016-06-28	8am	JN, JR, SC	70	NaCl	High	250	22	2.21	4600	7.04
2016-06-28	8am	JN, JR, SC	71	CaCl	Moderate	1000	21.7	3.77	1563	7.36
2016-06-28	8am	JN, JR, SC	72	CaCl	High	Naive	22.1	3.76	3781	6.8
2016-06-28	8am	JN, JR, SC	73	NaCl	High	1000	21.8	2.67	4674	7.18
2016-06-28	8am	JN, JR, SC	74	MgCl	High	250	22.3	2.71	2380	7.04
2016-06-28	8am	JN, JR, SC	75	MgCl	Moderate	1000	21.6	3.67	985	7.25
2016-06-28	8am	JN, JR, SC	76	CaCl	High	250	21.4	2.8	3786	6.98
2016-06-28	8am	JN, JR, SC	77	CaCl	Moderate	1000	21.6	2.95	1559	7.29
2016-06-28	8am	JN, JR, SC	78	NaCl	Moderate	250	21.7	2.82	1858	7.31
2016-06-28	8am	JN, JR, SC	79	MgCl	Moderate	Naive	22.3	3.13	1023	7.22
2016-06-28	8am	JN, JR, SC	80	MgCl	High	1000	21.7	3.32	2320	7.09
2016-06-28	8am	JN, JR, SC	81	None	Control	Naive	21.8	3.23	217.5	7.17
2016-06-28	8am	JN, JR, SC	82	MgCl	High	250	22.3	3.99	2272	7.08
2016-06-28	8am	JN, JR, SC	83	MgCl	Moderate	250	22.3	2.89	986	7.18
2016-06-28	8am	JN, JR, SC	84	NaCl	Moderate	1000	21.5	3.01	1868	7.46
2016-07-06	11:25am	JN, JR, SC	1	CaCl	High	1000	26.8	3.31	3847	7.27
2016-07-06	11:25am	JN, JR, SC	2	CaCl	High	250	29.8	3.39	4120	6.91
2016-07-06	11:25am	JN, JR, SC	3	NaCl	High	1000	26.5	4.34	4751	7.49
2016-07-06	11:25am	JN, JR, SC	4	MgCl	Moderate	1000	29	3.85	1088	7.75
2016-07-06	11:25am	JN, JR, SC	5	NaCl	High	250	28	5.71	4905	6.83
2016-07-06	11:25am	JN, JR, SC	6	None	Control	Naive	30.4	3.16	248	7.69
2016-07-06	11:25am	JN, JR, SC	7	None	Control	1000	26.7	3.04	238.1	7.58
2016-07-06	11:25am	JN, JR, SC	8	CaCl	Moderate	250	30.4	3.55	1769	6.99
2016-07-06	11:25am	JN, JR, SC	9	CaCl	Moderate	1000	27.4	2.93	1675	7.18
2016-07-06	11:25am	JN, JR, SC	10	CaCl	High	Naive	29.5	3.62	4091	6.88
2016-07-06	11:25am	JN, JR, SC	11	NaCl	Moderate	Naive	29.4	2.97	2059	7.07
2016-07-06	11:25am	JN, JR, SC	12	CaCl	High	250	26	4.56	3894	6.81
2016-07-06	11:25am	JN, JR, SC	13	CaCl	Moderate	Naive	30.4	3.52	1744	7.07
2016-07-06	11:25am	JN, JR, SC	14	CaCl	Moderate	250	26.6	3.68	1610	7.01
2016-07-06	11:25am	JN, JR, SC	15	None	Control	1000	28.7	3.38	252.8	7.67
2016-07-06	11:25am	JN, JR, SC	16	NaCl	High	Naive	26.4	5.61	4806	7.01
2016-07-06	11:25am	JN, JR, SC	17	CaCl	High	1000	29	4.15	4276	7.2
2016-07-06	11:25am	JN, JR, SC	18	MgCl	Moderate	Naive	26.4	5.54	1049	7.45
2016-07-06	11:25am	JN, JR, SC	19	NaCl	Moderate	250	29.6	3.91	2075	7.17
2016-07-06	11:25am	JN, JR, SC	20	NaCl	Moderate	Naive	26.3	3.6	1953	7.17
2016-07-06	11:25am	JN, JR, SC	21	CaCl	High	250	27.7	4.22	3951	7.08
2016-07-06	11:25am	JN, JR, SC	22	NaCl	Moderate	1000	29.7	3.25	2082	7.34
2016-07-06	11:25am	JN, JR, SC	23	MgCl	Moderate	250	27.3	3.32	1061	7.3
2016-07-06	11:25am	JN, JR, SC	24	NaCl	Moderate	1000	29	2.75	2051	7.25
2016-07-06	11:25am	JN, JR, SC	25	NaCl	High	250	27.3	3.13	4847	6.95
2016-07-06	11:25am	JN, JR, SC	26	CaCl	High	1000	28.9	4.59	4024	7.06
2016-07-06	11:25am	JN, JR, SC	27	NaCl	High	Naive	27.3	4.37	4811	6.89
2016-07-06	11:25am	JN, JR, SC	28	MgCl	High	1000	29	3.57	2471	7.23
2016-07-06	11:25am	JN, JR, SC	29	CaCl	Moderate	Naive	27.3	4.12	1677	7.12
2016-07-06	11:25am	JN, JR, SC	30	MgCl	High	1000	28.9	3.85	2475	7.19
2016-07-06	11:25am	JN, JR, SC	31	None	Control	Naive	29.6	3.21	245.2	7.42
2016-07-06	11:25am	JN, JR, SC	32	NaCl	High	Naive	26.7	5.74	4806	6.89
2016-07-06	11:25am	JN, JR, SC	33	None	Control	250	29.4	2.06	243.6	7.39
2016-07-06	11:25am	JN, JR, SC	34	None	Control	250	26.6	2.7	235.2	7.71
2016-07-06	11:25am	JN, JR, SC	35	MgCl	Moderate	250	28.3	4.44	1072	7.2
2016-07-06	11:25am	JN, JR, SC	36	CaCl	Moderate	250	26.2	5.61	1609	7.09
2016-07-06	11:25am	JN, JR, SC	37	CaCl	High	Naive	29.4	5.15	4185	7
2016-07-06	11:25am	JN, JR, SC	38	None	Control	250	26.8	2.96	237.7	7.39
2016-07-06	11:25am	JN, JR, SC	39	NaCl	High	1000	28.2	3.3	5047	7.17
2016-07-06	11:25am	JN, JR, SC	40	MgCl	High	Naive	27	5.82	2370	7.16
2016-07-06	11:25am	JN, JR, SC	41	CaCl	Moderate	1000	27.4	4.04	1650	7.45
2016-07-06	11:25am	JN, JR, SC	42	None	Control	Naive	30	3.95	239.4	7.53
2016-07-06	11:25am	JN, JR, SC	43	CaCl	High	1000	26.5	4.71	3900	7
2016-07-06	11:25am	JN, JR, SC	44	MgCl	Moderate	1000	29.2	2.77	1092	7.37
2016-07-06	11:25am	JN, JR, SC	45	MgCl	High	1000	26.3	4.68	2316	7.21
2016-07-06	11:25am	JN, JR, SC	46	MgCl	High	250	29.8	4.39	2515	7.12
2016-07-06	11:25am	JN, JR, SC	47	MgCl	Moderate	250	28.1	3.21	1087	7.26
2016-07-06	11:25am	JN, JR, SC	48	MgCl	High	Naive	30.9	4.47	2578	7.22
2016-07-06	11:25am	JN, JR, SC	49	MgCl	High	250	27.8	4.81	2412	7.18
2016-07-06	11:25am	JN, JR, SC	50	NaCl	Moderate	Naive	30	2.32	2077	7.16
2016-07-06	11:25am	JN, JR, SC	51	MgCl	Moderate	Naive	29.6	2.55	1103	7.31
2016-07-06	11:25am	JN, JR, SC	52	CaCl	Moderate	250	25.7	3.08	1612	7.3
2016-07-06	11:25am	JN, JR, SC	53	NaCl	Moderate	Naive	29.9	4.64	2108	7.25
2016-07-06	11:25am	JN, JR, SC	54	MgCl	Moderate	Naive	27.7	3.55	1065	7.42
2016-07-06	11:25am	JN, JR, SC	55	None	Control	250	29.5	3.61	232.8	7.48
2016-07-06	11:25am	JN, JR, SC	56	NaCl	High	250	26.2	5.43	4834	6.95
2016-07-06	11:25am	JN, JR, SC	57	NaCl	High	Naive	30.2	4.22	5142	6.89
2016-07-06	11:25am	JN, JR, SC	58	CaCl	High	Naive	26.7	4.34	3993	6.87
2016-07-06	11:25am	JN, JR, SC	59	NaCl	Moderate	1000	28.6	3.14	2038	7.28
2016-07-06	11:25am	JN, JR, SC	60	CaCl	Moderate	Naive	26.6	3.49	1651	7.09
2016-07-06	11:25am	JN, JR, SC	61	None	Control	1000	27.2	3.29	242	7.42
2016-07-06	11:25am	JN, JR, SC	62	NaCl	Moderate	250	29.8	3.68	2092	7.15
2016-07-06	11:25am	JN, JR, SC	63	NaCl	Moderate	250	27.7	6.62	1985	7.34
2016-07-06	11:25am	JN, JR, SC	64	CaCl	Moderate	Naive	29.9	3.17	1732	7.1
2016-07-06	11:25am	JN, JR, SC	65	MgCl	High	Naive	27.7	4.76	2426	7.14
2016-07-06	11:25am	JN, JR, SC	66	None	Control	1000	30	4.82	242.9	7.57
2016-07-06	11:25am	JN, JR, SC	67	MgCl	High	Naive	27.5	5.11	2410	7.13
2016-07-06	11:25am	JN, JR, SC	68	NaCl	High	1000	28.2	2.29	4930	7.02
2016-07-06	11:25am	JN, JR, SC	69	MgCl	Moderate	1000	27	3.37	1055	7.37
2016-07-06	11:25am	JN, JR, SC	70	NaCl	High	250	30.4	3.16	5240	7.02
2016-07-06	11:25am	JN, JR, SC	71	CaCl	Moderate	1000	29.6	2.99	1737	7.09
2016-07-06	11:25am	JN, JR, SC	72	CaCl	High	Naive	26.7	3.7	3961	6.92
2016-07-06	11:25am	JN, JR, SC	73	NaCl	High	1000	28.7	4.04	4993	7.15
2016-07-06	11:25am	JN, JR, SC	74	MgCl	High	250	25.4	4.38	2346	7.19
2016-07-06	11:25am	JN, JR, SC	75	MgCl	Moderate	1000	27.8	3.91	1063	7.5
2016-07-06	11:25am	JN, JR, SC	76	CaCl	High	250	25.8	2.48	3910	7.04
2016-07-06	11:25am	JN, JR, SC	77	CaCl	Moderate	1000	28.3	2.82	1693	7.11
2016-07-06	11:25am	JN, JR, SC	78	NaCl	Moderate	250	25.8	4.42	1931	7.3
2016-07-06	11:25am	JN, JR, SC	79	MgCl	Moderate	Naive	30	2.54	1126	7.2
2016-07-06	11:25am	JN, JR, SC	80	MgCl	High	1000	26.3	4.51	2341	7.07
2016-07-06	11:25am	JN, JR, SC	81	None	Control	Naive	27.8	2.96	244.3	7.36
2016-07-06	11:25am	JN, JR, SC	82	MgCl	High	250	28.8	4.32	2498	7.18
2016-07-06	11:25am	JN, JR, SC	83	MgCl	Moderate	250	29.1	2.76	1101	7.29
2016-07-06	11:25am	JN, JR, SC	84	NaCl	Moderate	1000	25.5	5.03	1914	7.16
2016-07-12	10:45am	JN, JR, SC	1	CaCl	High	1000	21.8	5.02	3522	7.55
2016-07-12	10:45am	JN, JR, SC	2	CaCl	High	250	24.3	5.29	3724	7.05
2016-07-12	10:45am	JN, JR, SC	3	NaCl	High	1000	22.1	6.49	4374	7.39
2016-07-12	10:45am	JN, JR, SC	4	MgCl	Moderate	1000	24.7	4.88	1002	7.84
2016-07-12	10:45am	JN, JR, SC	5	NaCl	High	250	22.8	6.02	4516	7.01
2016-07-12	10:45am	JN, JR, SC	6	None	Control	Naive	24.8	5.13	221.1	7.75
2016-07-12	10:45am	JN, JR, SC	7	None	Control	1000	22.4	4.91	218.7	7.73
2016-07-12	10:45am	JN, JR, SC	8	CaCl	Moderate	250	25.3	5.68	1613	7.37
2016-07-12	10:45am	JN, JR, SC	9	CaCl	Moderate	1000	23.2	4.44	1558	7.32
2016-07-12	10:45am	JN, JR, SC	10	CaCl	High	Naive	25.3	5.36	3768	7
2016-07-12	10:45am	JN, JR, SC	11	NaCl	Moderate	Naive	24.8	5.12	1897	7.11
2016-07-12	10:45am	JN, JR, SC	12	CaCl	High	250	20.7	5.13	3521	6.99
2016-07-12	10:45am	JN, JR, SC	13	CaCl	Moderate	Naive	24.5	5.3	1563	7.07
2016-07-12	10:45am	JN, JR, SC	14	CaCl	Moderate	250	21.1	5.31	1466	7.26
2016-07-12	10:45am	JN, JR, SC	15	None	Control	1000	23.5	5.23	233.8	7.83
2016-07-12	10:45am	JN, JR, SC	16	NaCl	High	Naive	21.7	7.36	4290	6.85
2016-07-12	10:45am	JN, JR, SC	17	CaCl	High	1000	23	5.48	3831	7.31
2016-07-12	10:45am	JN, JR, SC	18	MgCl	Moderate	Naive	21.4	7.17	957	7.37
2016-07-12	10:45am	JN, JR, SC	19	NaCl	Moderate	250	23.9	6.1	1875	7.13
2016-07-12	10:45am	JN, JR, SC	20	NaCl	Moderate	Naive	21.8	6.35	1812	7.06
2016-07-12	10:45am	JN, JR, SC	21	CaCl	High	250	22.5	5.64	3573	6.92
2016-07-12	10:45am	JN, JR, SC	22	NaCl	Moderate	1000	24.6	4.5	1919	7.4
2016-07-12	10:45am	JN, JR, SC	23	MgCl	Moderate	250	22.2	4.84	972	7.82
2016-07-12	10:45am	JN, JR, SC	24	NaCl	Moderate	1000	23.6	4.04	1848	7.32
2016-07-12	10:45am	JN, JR, SC	25	NaCl	High	250	22.2	4.58	4441	6.87
2016-07-12	10:45am	JN, JR, SC	26	CaCl	High	1000	23.9	5.52	3675	7.14
2016-07-12	10:45am	JN, JR, SC	27	NaCl	High	Naive	22.4	5.11	4469	6.91
2016-07-12	10:45am	JN, JR, SC	28	MgCl	High	1000	24.4	4.71	2277	7.32
2016-07-12	10:45am	JN, JR, SC	29	CaCl	Moderate	Naive	22.9	5.45	1596	7.31
2016-07-12	10:45am	JN, JR, SC	30	MgCl	High	1000	24.2	5.68	2278	7.31
2016-07-12	10:45am	JN, JR, SC	31	None	Control	Naive	25.2	4.48	228.5	7.74
2016-07-12	10:45am	JN, JR, SC	32	NaCl	High	Naive	22.5	5.39	4501	6.92
2016-07-12	10:45am	JN, JR, SC	33	None	Control	250	23.9	4.87	222.1	7.6
2016-07-12	10:45am	JN, JR, SC	34	None	Control	250	21	4.23	212.2	7.51
2016-07-12	10:45am	JN, JR, SC	35	MgCl	Moderate	250	23.4	6.12	985	7.27
2016-07-12	10:45am	JN, JR, SC	36	CaCl	Moderate	250	21.1	6.36	1460	7.17
2016-07-12	10:45am	JN, JR, SC	37	CaCl	High	Naive	24.5	6.85	3812	7.17
2016-07-12	10:45am	JN, JR, SC	38	None	Control	250	21.3	4.88	217.2	7.8
2016-07-12	10:45am	JN, JR, SC	39	NaCl	High	1000	23.7	6.59	4603	7.2
2016-07-12	10:45am	JN, JR, SC	40	MgCl	High	Naive	21.7	6.59	2144	7.26
2016-07-12	10:45am	JN, JR, SC	41	CaCl	Moderate	1000	22.5	6.2	1513	7.61
2016-07-12	10:45am	JN, JR, SC	42	None	Control	Naive	25.4	4.35	222.7	7.59
2016-07-12	10:45am	JN, JR, SC	43	CaCl	High	1000	21.5	5.25	3565	7.19
2016-07-12	10:45am	JN, JR, SC	44	MgCl	Moderate	1000	24.5	4.61	997	7.45
2016-07-12	10:45am	JN, JR, SC	45	MgCl	High	1000	22	6.08	2135	7.28
2016-07-12	10:45am	JN, JR, SC	46	MgCl	High	250	25.2	6.31	2360	7.12
2016-07-12	10:45am	JN, JR, SC	47	MgCl	Moderate	250	22.7	4.56	990	7.45
2016-07-12	10:45am	JN, JR, SC	48	MgCl	High	Naive	26.4	5.06	2408	7.32
2016-07-12	10:45am	JN, JR, SC	49	MgCl	High	250	22.6	5.75	2179	7.17
2016-07-12	10:45am	JN, JR, SC	50	NaCl	Moderate	Naive	26	3.41	1934	7.17
2016-07-12	10:45am	JN, JR, SC	51	MgCl	Moderate	Naive	24.9	3.86	1008	7.38
2016-07-12	10:45am	JN, JR, SC	52	CaCl	Moderate	250	21.2	5.11	1476	7.19
2016-07-12	10:45am	JN, JR, SC	53	NaCl	Moderate	Naive	25.6	7.41	1951	7.31
2016-07-12	10:45am	JN, JR, SC	54	MgCl	Moderate	Naive	22.5	4.67	988	7.62
2016-07-12	10:45am	JN, JR, SC	55	None	Control	250	24.5	4.25	211.8	7.66
2016-07-12	10:45am	JN, JR, SC	56	NaCl	High	250	21	6.52	4389	6.93
2016-07-12	10:45am	JN, JR, SC	57	NaCl	High	Naive	25.9	5.56	4774	6.92
2016-07-12	10:45am	JN, JR, SC	58	CaCl	High	Naive	21.7	5.26	3657	6.93
2016-07-12	10:45am	JN, JR, SC	59	NaCl	Moderate	1000	24.1	4.36	1877	7.35
2016-07-12	10:45am	JN, JR, SC	60	CaCl	Moderate	Naive	22.1	5.43	1516	7.17
2016-07-12	10:45am	JN, JR, SC	61	None	Control	1000	22.7	4.66	226.7	7.6
2016-07-12	10:45am	JN, JR, SC	62	NaCl	Moderate	250	24.9	4.4	1926	7.26
2016-07-12	10:45am	JN, JR, SC	63	NaCl	Moderate	250	23.1	6.82	1835	7.24
2016-07-12	10:45am	JN, JR, SC	64	CaCl	Moderate	Naive	25.4	4.89	1574	7.18
2016-07-12	10:45am	JN, JR, SC	65	MgCl	High	Naive	23.6	5.42	2281	7.17
2016-07-12	10:45am	JN, JR, SC	66	None	Control	1000	23.9	6.56	2212	8.07
2016-07-12	10:45am	JN, JR, SC	67	MgCl	High	Naive	22.7	4.77	2195	7.17
2016-07-12	10:45am	JN, JR, SC	68	NaCl	High	1000	23.4	4.99	4533	7.1
2016-07-12	10:45am	JN, JR, SC	69	MgCl	Moderate	1000	22.5	5.29	964	7.43
2016-07-12	10:45am	JN, JR, SC	70	NaCl	High	250	25.3	4.6	4805	6.82
2016-07-12	10:45am	JN, JR, SC	71	CaCl	Moderate	1000	24.6	5.22	1591	7.23
2016-07-12	10:45am	JN, JR, SC	72	CaCl	High	Naive	22	5.82	3599	7.08
2016-07-12	10:45am	JN, JR, SC	73	NaCl	High	1000	24.1	5.82	4595	7.17
2016-07-12	10:45am	JN, JR, SC	74	MgCl	High	250	22.3	6.57	2139	7.35
2016-07-12	10:45am	JN, JR, SC	75	MgCl	Moderate	1000	23.2	4.19	980	7.53
2016-07-12	10:45am	JN, JR, SC	76	CaCl	High	250	21	4.28	3536	7.01
2016-07-12	10:45am	JN, JR, SC	77	CaCl	Moderate	1000	23.8	4.5	1569	7.24
2016-07-12	10:45am	JN, JR, SC	78	NaCl	Moderate	250	21.2	3.93	1758	7.17
2016-07-12	10:45am	JN, JR, SC	79	MgCl	Moderate	Naive	25.4	4.07	1040	7.26
2016-07-12	10:45am	JN, JR, SC	80	MgCl	High	1000	21.2	6.98	2112	7.21
2016-07-12	10:45am	JN, JR, SC	81	None	Control	Naive	24.3	5.78	224.4	7.5
2016-07-12	10:45am	JN, JR, SC	82	MgCl	High	250	25	6.06	2327	7.16
2016-07-12	10:45am	JN, JR, SC	83	MgCl	Moderate	250	24.5	2.91	1015	7.31
2016-07-12	10:45am	JN, JR, SC	84	NaCl	Moderate	1000	21.3	6.89	1743	7.11
2016-07-27	11:25am	JN, JR, SC	1	CaCl	High	1000	25.8	4.91	3857	7.66
2016-07-27	11:25am	JN, JR, SC	2	CaCl	High	250	28.7	5	4023	7.46
2016-07-27	11:25am	JN, JR, SC	3	NaCl	High	1000	26	5.35	4777	7.44
2016-07-27	11:25am	JN, JR, SC	4	MgCl	Moderate	1000	29.2	4.56	1108	7.76
2016-07-27	11:25am	JN, JR, SC	5	NaCl	High	250	26	5.78	4756	7.19
2016-07-27	11:25am	JN, JR, SC	6	None	Control	Naive	29.8	4.16	269.6	7.78
2016-07-27	11:25am	JN, JR, SC	7	None	Control	1000	25.8	4.1	254.4	7.75
2016-07-27	11:25am	JN, JR, SC	8	CaCl	Moderate	250	29.7	4.33	1747	7.26
2016-07-27	11:25am	JN, JR, SC	9	CaCl	Moderate	1000	27	4.34	1692	7.22
2016-07-27	11:25am	JN, JR, SC	10	CaCl	High	Naive	29.4	6.02	4158	7.08
2016-07-27	11:25am	JN, JR, SC	11	NaCl	Moderate	Naive	29.1	4.58	2097	7.28
2016-07-27	11:25am	JN, JR, SC	12	CaCl	High	250	25.4	4.54	3848	7.14
2016-07-27	11:25am	JN, JR, SC	13	CaCl	Moderate	Naive	29.3	4.85	1730	7.25
2016-07-27	11:25am	JN, JR, SC	14	CaCl	Moderate	250	25.1	4.61	1569	7.25
2016-07-27	11:25am	JN, JR, SC	15	None	Control	1000	29.8	4.33	287.9	7.64
2016-07-27	11:25am	JN, JR, SC	16	NaCl	High	Naive	25.4	6.48	4767	7.16
2016-07-27	11:25am	JN, JR, SC	17	CaCl	High	1000	29	5.32	4153	7.25
2016-07-27	11:25am	JN, JR, SC	18	MgCl	Moderate	Naive	25.6	5.46	1051	7.66
2016-07-27	11:25am	JN, JR, SC	19	NaCl	Moderate	250	28.8	5.39	2085	7.63
2016-07-27	11:25am	JN, JR, SC	20	NaCl	Moderate	Naive	25.8	5.47	1939	7.68
2016-07-27	11:25am	JN, JR, SC	21	CaCl	High	250	26.8	5.01	3973	7.03
2016-07-27	11:25am	JN, JR, SC	22	NaCl	Moderate	1000	30	4.52	2093	7.45
2016-07-27	11:25am	JN, JR, SC	23	MgCl	Moderate	250	27.1	3.7	1094	7.33
2016-07-27	11:25am	JN, JR, SC	24	NaCl	Moderate	1000	29.3	3.36	2070	7.15
2016-07-27	11:25am	JN, JR, SC	25	NaCl	High	250	27.5	4.67	4935	7.02
2016-07-27	11:25am	JN, JR, SC	26	CaCl	High	1000	28.7	4.82	4012	7.09
2016-07-27	11:25am	JN, JR, SC	27	NaCl	High	Naive	27.4	4.37	4826	7.17
2016-07-27	11:25am	JN, JR, SC	28	MgCl	High	1000	30.1	5.02	2500	7.33
2016-07-27	11:25am	JN, JR, SC	29	CaCl	Moderate	Naive	26.4	4.71	1644	7.29
2016-07-27	11:25am	JN, JR, SC	30	MgCl	High	1000	29	3.76	2523	7.24
2016-07-27	11:25am	JN, JR, SC	31	None	Control	Naive	29.3	3.94	271.1	7.59
2016-07-27	11:25am	JN, JR, SC	32	NaCl	High	Naive	25.8	6.27	4814	7.09
2016-07-27	11:25am	JN, JR, SC	33	None	Control	250	29.5	3.76	267.5	7.76
2016-07-27	11:25am	JN, JR, SC	34	None	Control	250	26.1	4.27	252.8	7.54
2016-07-27	11:25am	JN, JR, SC	35	MgCl	Moderate	250	29.2	4.94	1109	7.33
2016-07-27	11:25am	JN, JR, SC	36	CaCl	Moderate	250	25.5	5.37	1613	7.2
2016-07-27	11:25am	JN, JR, SC	37	CaCl	High	Naive	28.9	6.02	4129	7.07
2016-07-27	11:25am	JN, JR, SC	38	None	Control	250	26	3.57	258.1	7.55
2016-07-27	11:25am	JN, JR, SC	39	NaCl	High	1000	29.2	5.52	5178	7.22
2016-07-27	11:25am	JN, JR, SC	40	MgCl	High	Naive	25.9	5.68	2424	7.24
2016-07-27	11:25am	JN, JR, SC	41	CaCl	Moderate	1000	27.4	6.33	1630	7.46
2016-07-27	11:25am	JN, JR, SC	42	None	Control	Naive	30.1	4.7	261.7	7.61
2016-07-27	11:25am	JN, JR, SC	43	CaCl	High	1000	26	5.29	3941	7.04
2016-07-27	11:25am	JN, JR, SC	44	MgCl	Moderate	1000	29.9	4.25	1139	7.36
2016-07-27	11:25am	JN, JR, SC	45	MgCl	High	1000	26.8	5.08	2436	7.2
2016-07-27	11:25am	JN, JR, SC	46	MgCl	High	250	30.7	6.02	2647	7.31
2016-07-27	11:25am	JN, JR, SC	47	MgCl	Moderate	250	27.2	3.77	1100	7.68
2016-07-27	11:25am	JN, JR, SC	48	MgCl	High	Naive	30.2	4.01	2666	7.21
2016-07-27	11:25am	JN, JR, SC	49	MgCl	High	250	26.9	5.41	2457	7.29
2016-07-27	11:25am	JN, JR, SC	50	NaCl	Moderate	Naive	29.9	3.09	2081	7.17
2016-07-27	11:25am	JN, JR, SC	51	MgCl	Moderate	Naive	28	4.06	1118	7.37
2016-07-27	11:25am	JN, JR, SC	52	CaCl	Moderate	250	25.5	4.85	1632	7.35
2016-07-27	11:25am	JN, JR, SC	53	NaCl	Moderate	Naive	29.6	3.49	2177	7.2
2016-07-27	11:25am	JN, JR, SC	54	MgCl	Moderate	Naive	26.8	4.26	1095	7.41
2016-07-27	11:25am	JN, JR, SC	55	None	Control	250	30.7	3.04	263.3	7.62
2016-07-27	11:25am	JN, JR, SC	56	NaCl	High	250	26.7	7.16	5154	7.11
2016-07-27	11:25am	JN, JR, SC	57	NaCl	High	Naive	29.5	5.76	5274	7.05
2016-07-27	11:25am	JN, JR, SC	58	CaCl	High	Naive	26.2	6.27	3987	7.06
2016-07-27	11:25am	JN, JR, SC	59	NaCl	Moderate	1000	30.1	4.42	2081	7.46
2016-07-27	11:25am	JN, JR, SC	60	CaCl	Moderate	Naive	25.7	5.49	1648	7.45
2016-07-27	11:25am	JN, JR, SC	61	None	Control	1000	27.8	4.55	273.5	7.42
2016-07-27	11:25am	JN, JR, SC	62	NaCl	Moderate	250	29.9	4.91	2165	7.02
2016-07-27	11:25am	JN, JR, SC	63	NaCl	Moderate	250	27.3	5.21	2053	7.25
2016-07-27	11:25am	JN, JR, SC	64	CaCl	Moderate	Naive	29.7	5.21	1798	7.11
2016-07-27	11:25am	JN, JR, SC	65	MgCl	High	Naive	27.6	4.68	2478	7.25
2016-07-27	11:25am	JN, JR, SC	66	None	Control	1000	30.2	6.51	268.8	7.69
2016-07-27	11:25am	JN, JR, SC	67	MgCl	High	Naive	26.8	5.12	2463	7.46
2016-07-27	11:25am	JN, JR, SC	68	NaCl	High	1000	28.6	4.91	5019	7.12
2016-07-27	11:25am	JN, JR, SC	69	MgCl	Moderate	1000	27.2	4.39	1084	7.47
2016-07-27	11:25am	JN, JR, SC	70	NaCl	High	250	29.8	6.27	5246	6.96
2016-07-27	11:25am	JN, JR, SC	71	CaCl	Moderate	1000	29.8	4.25	1797	7.18
2016-07-27	11:25am	JN, JR, SC	72	CaCl	High	Naive	25.8	6.08	3859	7.04
2016-07-27	11:25am	JN, JR, SC	73	NaCl	High	1000	29.4	6.42	5198	7.03
2016-07-27	11:25am	JN, JR, SC	74	MgCl	High	250	25.9	4.82	2417	7.41
2016-07-27	11:25am	JN, JR, SC	75	MgCl	Moderate	1000	26.9	5.5	1131	7.45
2016-07-27	11:25am	JN, JR, SC	76	CaCl	High	250	25.9	4.31	4001	7.06
2016-07-27	11:25am	JN, JR, SC	77	CaCl	Moderate	1000	29.2	4.18	1752	7.2
2016-07-27	11:25am	JN, JR, SC	78	NaCl	Moderate	250	26.3	4.27	2012	7.21
2016-07-27	11:25am	JN, JR, SC	79	MgCl	Moderate	Naive	31.2	3.3	1206	7.23
2016-07-27	11:25am	JN, JR, SC	80	MgCl	High	1000	26.8	5.13	2355	7.06
2016-07-27	11:25am	JN, JR, SC	81	None	Control	Naive	27.1	3.95	263	7.49
2016-07-27	11:25am	JN, JR, SC	82	MgCl	High	250	28.9	4.73	2527	7.1
2016-07-27	11:25am	JN, JR, SC	83	MgCl	Moderate	250	29.4	4.03	1120	7.28
2016-07-27	11:25am	JN, JR, SC	84	NaCl	Moderate	1000	25.7	5.59	1938	7.12
2016-08-04	1:20pm	JN, JR, SC	1	CaCl	High	1000	25.3	5.38	3013	7.73
2016-08-04	1:20pm	JN, JR, SC	2	CaCl	High	250	27.2	6.17	3132	7.75
2016-08-04	1:20pm	JN, JR, SC	3	NaCl	High	1000	26.2	7.98	3727	7.73
2016-08-04	1:20pm	JN, JR, SC	4	MgCl	Moderate	1000	28.4	6.63	849	8.18
2016-08-04	1:20pm	JN, JR, SC	5	NaCl	High	250	26.5	6.99	3842	7.03
2016-08-04	1:20pm	JN, JR, SC	6	None	Control	Naive	28	6.09	206.2	7.93
2016-08-04	1:20pm	JN, JR, SC	7	None	Control	1000	26.6	6.1	205.1	8.02
2016-08-04	1:20pm	JN, JR, SC	8	CaCl	Moderate	250	27.9	5.34	1404	7.21
2016-08-04	1:20pm	JN, JR, SC	9	CaCl	Moderate	1000	26	6.52	1333	7.67
2016-08-04	1:20pm	JN, JR, SC	10	CaCl	High	Naive	28.2	7.3	3274	7.27
2016-08-04	1:20pm	JN, JR, SC	11	NaCl	Moderate	Naive	28.8	7.25	1675	7.36
2016-08-04	1:20pm	JN, JR, SC	12	CaCl	High	250	26.1	5.22	3188	7.14
2016-08-04	1:20pm	JN, JR, SC	13	CaCl	Moderate	Naive	28.9	5.43	1400	7.3
2016-08-04	1:20pm	JN, JR, SC	14	CaCl	Moderate	250	25.4	5.26	1292	7.27
2016-08-04	1:20pm	JN, JR, SC	15	None	Control	1000	28.3	5.88	216.7	8.06
2016-08-04	1:20pm	JN, JR, SC	16	NaCl	High	Naive	25.8	7.11	3824	7.18
2016-08-04	1:20pm	JN, JR, SC	17	CaCl	High	1000	28.4	7.03	3250	7.68
2016-08-04	1:20pm	JN, JR, SC	18	MgCl	Moderate	Naive	26	7.24	820	7.56
2016-08-04	1:20pm	JN, JR, SC	19	NaCl	Moderate	250	28.8	7.25	1636	7.4
2016-08-04	1:20pm	JN, JR, SC	20	NaCl	Moderate	Naive	27.2	6.82	1580	7.32
2016-08-04	1:20pm	JN, JR, SC	21	CaCl	High	250	26	6.89	3080	7.35
2016-08-04	1:20pm	JN, JR, SC	22	NaCl	Moderate	1000	29	5.68	1599	7.62
2016-08-04	1:20pm	JN, JR, SC	23	MgCl	Moderate	250	26.5	4.24	842	7.39
2016-08-04	1:20pm	JN, JR, SC	24	NaCl	Moderate	1000	28.9	4.71	1615	7.55
2016-08-04	1:20pm	JN, JR, SC	25	NaCl	High	250	26.4	6.87	3990	7.15
2016-08-04	1:20pm	JN, JR, SC	26	CaCl	High	1000	27.3	6.2	3220	7.2
2016-08-04	1:20pm	JN, JR, SC	27	NaCl	High	Naive	26.4	7.44	4017	7.12
2016-08-04	1:20pm	JN, JR, SC	28	MgCl	High	1000	27.6	6.51	1914	7.59
2016-08-04	1:20pm	JN, JR, SC	29	CaCl	Moderate	Naive	26.9	6.17	1326	7.47
2016-08-04	1:20pm	JN, JR, SC	30	MgCl	High	1000	28.6	6.3	1964	7.59
2016-08-04	1:20pm	JN, JR, SC	31	None	Control	Naive	28	5.59	210.5	7.69
2016-08-04	1:20pm	JN, JR, SC	32	NaCl	High	Naive	26.2	7.85	3855	7.14
2016-08-04	1:20pm	JN, JR, SC	33	None	Control	250	28.4	5.06	215.4	7.58
2016-08-04	1:20pm	JN, JR, SC	34	None	Control	250	26.4	6.14	209.8	7.72
2016-08-04	1:20pm	JN, JR, SC	35	MgCl	Moderate	250	28.3	7.5	900	7.58
2016-08-04	1:20pm	JN, JR, SC	36	CaCl	Moderate	250	25.5	7.16	1258	7.56
2016-08-04	1:20pm	JN, JR, SC	37	CaCl	High	Naive	28.7	5.7	3281	7.22
2016-08-04	1:20pm	JN, JR, SC	38	None	Control	250	26.4	5.23	205	7.65
2016-08-04	1:20pm	JN, JR, SC	39	NaCl	High	1000	28.1	7.55	3924	7.47
2016-08-04	1:20pm	JN, JR, SC	40	MgCl	High	Naive	26	8.7	1957	7.45
2016-08-04	1:20pm	JN, JR, SC	41	CaCl	Moderate	1000	26.4	7.87	1304	7.83
2016-08-04	1:20pm	JN, JR, SC	42	None	Control	Naive	28	6.04	206	7.71
2016-08-04	1:20pm	JN, JR, SC	43	CaCl	High	1000	26.4	6.4	3029	7.46
2016-08-04	1:20pm	JN, JR, SC	44	MgCl	Moderate	1000	27.8	5.63	851	7.69
2016-08-04	1:20pm	JN, JR, SC	45	MgCl	High	1000	26.8	6.19	1847	7.51
2016-08-04	1:20pm	JN, JR, SC	46	MgCl	High	250	26.9	8.09	1921	7.34
2016-08-04	1:20pm	JN, JR, SC	47	MgCl	Moderate	250	26.8	4.42	857	7.46
2016-08-04	1:20pm	JN, JR, SC	48	MgCl	High	Naive	29.3	4.88	2067	7.42
2016-08-04	1:20pm	JN, JR, SC	49	MgCl	High	250	26.1	7.23	1992	7.41
2016-08-04	1:20pm	JN, JR, SC	50	NaCl	Moderate	Naive	29.3	4.29	1715	7.31
2016-08-04	1:20pm	JN, JR, SC	51	MgCl	Moderate	Naive	28.7	6.25	865	7.52
2016-08-04	1:20pm	JN, JR, SC	52	CaCl	Moderate	250	26.5	5.36	1371	7.51
2016-08-04	1:20pm	JN, JR, SC	53	NaCl	Moderate	Naive	28.3	6.84	1630	7.46
2016-08-04	1:20pm	JN, JR, SC	54	MgCl	Moderate	Naive	26.2	6.62	863	7.76
2016-08-04	1:20pm	JN, JR, SC	55	None	Control	250	29.4	5.56	198	7.65
2016-08-04	1:20pm	JN, JR, SC	56	NaCl	High	250	26.2	8.04	3853	7.1
2016-08-04	1:20pm	JN, JR, SC	57	NaCl	High	Naive	29	7.77	4052	7.21
2016-08-04	1:20pm	JN, JR, SC	58	CaCl	High	Naive	27.1	6.61	3115	7.16
2016-08-04	1:20pm	JN, JR, SC	59	NaCl	Moderate	1000	28	5.77	1603	7.63
2016-08-04	1:20pm	JN, JR, SC	60	CaCl	Moderate	Naive	27.8	6.03	1315	7.35
2016-08-04	1:20pm	JN, JR, SC	61	None	Control	1000	26.8	6.16	206.6	7.57
2016-08-04	1:20pm	JN, JR, SC	62	NaCl	Moderate	250	28.4	2.8	1645	7.37
2016-08-04	1:20pm	JN, JR, SC	63	NaCl	Moderate	250	26.8	6.56	1635	7.4
2016-08-04	1:20pm	JN, JR, SC	64	CaCl	Moderate	Naive	28.4	5.6	1417	7.29
2016-08-04	1:20pm	JN, JR, SC	65	MgCl	High	Naive	26.9	5.62	1917	7.32
2016-08-04	1:20pm	JN, JR, SC	66	None	Control	1000	28.3	7.4	202.4	8.14
2016-08-04	1:20pm	JN, JR, SC	67	MgCl	High	Naive	26	7	1960	7.34
2016-08-04	1:20pm	JN, JR, SC	68	NaCl	High	1000	28.5	7.94	3989	7.3
2016-08-04	1:20pm	JN, JR, SC	69	MgCl	Moderate	1000	27.2	4.74	860	7.57
2016-08-04	1:20pm	JN, JR, SC	70	NaCl	High	250	29.1	8.17	4037	7.2
2016-08-04	1:20pm	JN, JR, SC	71	CaCl	Moderate	1000	28.9	5	1385	7.36
2016-08-04	1:20pm	JN, JR, SC	72	CaCl	High	Naive	26.1	6.25	3158	7.22
2016-08-04	1:20pm	JN, JR, SC	73	NaCl	High	1000	27.9	6.56	4055	7.41
2016-08-04	1:20pm	JN, JR, SC	74	MgCl	High	250	26.1	6.32	2003	7.31
2016-08-04	1:20pm	JN, JR, SC	75	MgCl	Moderate	1000	28.2	6.03	868	7.5
2016-08-04	1:20pm	JN, JR, SC	76	CaCl	High	250	27	7.11	3135	7.17
2016-08-04	1:20pm	JN, JR, SC	77	CaCl	Moderate	1000	27.8	5.33	1384	7.32
2016-08-04	1:20pm	JN, JR, SC	78	NaCl	Moderate	250	26	4.55	1540	7.39
2016-08-04	1:20pm	JN, JR, SC	79	MgCl	Moderate	Naive	29.5	4.75	915	7.35
2016-08-04	1:20pm	JN, JR, SC	80	MgCl	High	1000	26.1	6.18	1848	7.32
2016-08-04	1:20pm	JN, JR, SC	81	None	Control	Naive	27.3	4.54	214.9	7.51
2016-08-04	1:20pm	JN, JR, SC	82	MgCl	High	250	27.9	5.28	1987	7.42
2016-08-04	1:20pm	JN, JR, SC	83	MgCl	Moderate	250	28.2	4.68	897	7.51
2016-08-04	1:20pm	JN, JR, SC	84	NaCl	Moderate	1000	25.5	6.22	1563	7.3
2016-08-12	9am	JN, JR	1	CaCl	High	1000	23.4	4.91	2720	7.63
2016-08-12	9am	JN, JR	2	CaCl	High	250	23.9	4.12	2761	6.87
2016-08-12	9am	JN, JR	3	NaCl	High	1000	23.5	4.17	3370	7.37
2016-08-12	9am	JN, JR	4	MgCl	Moderate	1000	23.9	5	738	7.94
2016-08-12	9am	JN, JR	5	NaCl	High	250	23.5	4.07	3372	6.78
2016-08-12	9am	JN, JR	6	None	Control	Naive	24.6	3.64	183.9	7.34
2016-08-12	9am	JN, JR	7	None	Control	1000	23.5	3.63	186.1	7.61
2016-08-12	9am	JN, JR	8	CaCl	Moderate	250	24	3.48	1210	7.2
2016-08-12	9am	JN, JR	9	CaCl	Moderate	1000	23.5	4.21	1204	7.3
2016-08-12	9am	JN, JR	10	CaCl	High	Naive	24.5	4.29	2936	6.79
2016-08-12	9am	JN, JR	11	NaCl	Moderate	Naive	24	4.42	1461	6.9
2016-08-12	9am	JN, JR	12	CaCl	High	250	23.3	5.28	2836	6.84
2016-08-12	9am	JN, JR	13	CaCl	Moderate	Naive	24.3	3.91	1222	6.94
2016-08-12	9am	JN, JR	14	CaCl	Moderate	250	23.5	4.53	1182	7.08
2016-08-12	9am	JN, JR	15	None	Control	1000	23.8	4.61	191.7	7.7
2016-08-12	9am	JN, JR	16	NaCl	High	Naive	23.7	5.07	3452	6.61
2016-08-12	9am	JN, JR	17	CaCl	High	1000	23.7	6.1	2806	7.43
2016-08-12	9am	JN, JR	18	MgCl	Moderate	Naive	23.8	4.77	733	7.04
2016-08-12	9am	JN, JR	19	NaCl	Moderate	250	23.8	5.58	1401	6.94
2016-08-12	9am	JN, JR	20	NaCl	Moderate	Naive	23.5	5.39	1408	6.8
2016-08-12	9am	JN, JR	21	CaCl	High	250	23.6	4.77	2763	6.75
2016-08-12	9am	JN, JR	22	NaCl	Moderate	1000	23.8	4.03	1374	7.21
2016-08-12	9am	JN, JR	23	MgCl	Moderate	250	23.5	3.38	726	7.1
2016-08-12	9am	JN, JR	24	NaCl	Moderate	1000	23.8	3.07	1383	7.14
2016-08-12	9am	JN, JR	25	NaCl	High	250	23.7	5.14	3485	6.53
2016-08-12	9am	JN, JR	26	CaCl	High	1000	23.8	4.65	2825	7.06
2016-08-12	9am	JN, JR	27	NaCl	High	Naive	23.8	4.89	3515	6.51
2016-08-12	9am	JN, JR	28	MgCl	High	1000	23.8	4.52	1711	7.26
2016-08-12	9am	JN, JR	29	CaCl	Moderate	Naive	23.7	4.2	1170	7.07
2016-08-12	9am	JN, JR	30	MgCl	High	1000	23.5	4.64	1674	7.27
2016-08-12	9am	JN, JR	31	None	Control	Naive	24.2	4.12	182	7.44
2016-08-12	9am	JN, JR	32	NaCl	High	Naive	23.6	4.62	3378	6.67
2016-08-12	9am	JN, JR	33	None	Control	250	23.8	3.27	186.5	7.22
2016-08-12	9am	JN, JR	34	None	Control	250	23.6	3.91	180.1	7.17
2016-08-12	9am	JN, JR	35	MgCl	Moderate	250	23.7	3.47	767	7.03
2016-08-12	9am	JN, JR	36	CaCl	Moderate	250	23.5	4.72	1114	6.92
2016-08-12	9am	JN, JR	37	CaCl	High	Naive	24.1	5.07	2817	6.63
2016-08-12	9am	JN, JR	38	None	Control	250	23.3	3.47	183.7	7.35
2016-08-12	9am	JN, JR	39	NaCl	High	1000	23.7	4.42	3436	6.99
2016-08-12	9am	JN, JR	40	MgCl	High	Naive	23.4	4.05	1766	6.83
2016-08-12	9am	JN, JR	41	CaCl	Moderate	1000	23.5	5.32	1152	7.42
2016-08-12	9am	JN, JR	42	None	Control	Naive	24.2	5.01	178.5	7.2
2016-08-12	9am	JN, JR	43	CaCl	High	1000	23.4	4.67	2664	7.11
2016-08-12	9am	JN, JR	44	MgCl	Moderate	1000	23.8	3.77	723	7.34
2016-08-12	9am	JN, JR	45	MgCl	High	1000	23.5	3.94	1645	7.16
2016-08-12	9am	JN, JR	46	MgCl	High	250	24.1	3.62	1678	6.93
2016-08-12	9am	JN, JR	47	MgCl	Moderate	250	23.8	3.06	754	7.22
2016-08-12	9am	JN, JR	48	MgCl	High	Naive	24.3	3.93	1742	6.94
2016-08-12	9am	JN, JR	49	MgCl	High	250	23.6	5.15	1772	6.94
2016-08-12	9am	JN, JR	50	NaCl	Moderate	Naive	24.3	3.13	1470	6.71
2016-08-12	9am	JN, JR	51	MgCl	Moderate	Naive	24.2	4.45	746	7
2016-08-12	9am	JN, JR	52	CaCl	Moderate	250	23.5	3.66	1217	6.9
2016-08-12	9am	JN, JR	53	NaCl	Moderate	Naive	23.9	3.9	1402	6.8
2016-08-12	9am	JN, JR	54	MgCl	Moderate	Naive	23.6	3.45	763	7.03
2016-08-12	9am	JN, JR	55	None	Control	250	24	2.76	168.6	7.22
2016-08-12	9am	JN, JR	56	NaCl	High	250	23.4	5.6	3374	6.61
2016-08-12	9am	JN, JR	57	NaCl	High	Naive	24.2	4.4	3449	6.64
2016-08-12	9am	JN, JR	58	CaCl	High	Naive	23.6	5.62	2771	6.87
2016-08-12	9am	JN, JR	59	NaCl	Moderate	1000	23.8	3.65	1382	7.15
2016-08-12	9am	JN, JR	60	CaCl	Moderate	Naive	23.6	4.35	1165	6.95
2016-08-12	9am	JN, JR	61	None	Control	1000	23.5	4.15	185.7	7.28
2016-08-12	9am	JN, JR	62	NaCl	Moderate	250	24.2	2.19	1407	6.98
2016-08-12	9am	JN, JR	63	NaCl	Moderate	250	23.7	3.61	1444	6.95
2016-08-12	9am	JN, JR	64	CaCl	Moderate	Naive	24.1	4.34	1206	6.81
2016-08-12	9am	JN, JR	65	MgCl	High	Naive	23.9	4.61	1710	6.83
2016-08-12	9am	JN, JR	66	None	Control	1000	23.9	2.92	170	7.68
2016-08-12	9am	JN, JR	67	MgCl	High	Naive	24.1	4.38	1763	6.88
2016-08-12	9am	JN, JR	68	NaCl	High	1000	23.8	4.78	3474	6.9
2016-08-12	9am	JN, JR	69	MgCl	Moderate	1000	23.6	6.54	750	7.27
2016-08-12	9am	JN, JR	70	NaCl	High	250	24.2	3.99	3455	6.62
2016-08-12	9am	JN, JR	71	CaCl	Moderate	1000	23.9	3.13	1173	7.08
2016-08-12	9am	JN, JR	72	CaCl	High	Naive	23.7	4.01	2787	6.69
2016-08-12	9am	JN, JR	73	NaCl	High	1000	23.9	4.86	3563	6.95
2016-08-12	9am	JN, JR	74	MgCl	High	250	23.5	4.54	1795	7.05
2016-08-12	9am	JN, JR	75	MgCl	Moderate	1000	23.7	3.65	757	7.32
2016-08-12	9am	JN, JR	76	CaCl	High	250	23.3	4.3	2828	6.81
2016-08-12	9am	JN, JR	77	CaCl	Moderate	1000	23.8	3.74	1213	7.07
2016-08-12	9am	JN, JR	78	NaCl	Moderate	250	23.7	5.2	1384	6.92
2016-08-12	9am	JN, JR	79	MgCl	Moderate	Naive	24.1	3.45	780	6.96
2016-08-12	9am	JN, JR	80	MgCl	High	1000	23.4	4.45	1681	7
2016-08-12	9am	JN, JR	81	None	Control	Naive	23.7	3.32	189.9	7.09
2016-08-12	9am	JN, JR	82	MgCl	High	250	24.2	4.04	1727	6.91
2016-08-12	9am	JN, JR	83	MgCl	Moderate	250	24.2	3.01	776	7.04
2016-08-12	9am	JN, JR	84	NaCl	Moderate	1000	23.4	3.41	1432	6.9

## Sheet: Daphnia and Phytoplankton
Tank	Salt Type	Salt concentration	Tolerance level	Daphnia abundance	Observer	Sample day	Chl a (RFU)
1	CaCl	High	1000	80	LD	21	18.3
2	CaCl	High	250	10	LD	21	80.7
3	NaCl	High	1000	2	LD	21	171.3
4	MgCl	Moderate	1000	18	LD	21	80.6
5	NaCl	High	250	2	LD	21	160.7
6	Absent	Low	Naive	217	LD	21	76.7
7	Absent	Low	1000	89	LD	21	33.6
8	CaCl	Moderate	250	86	LD	21	69.3
9	CaCl	Moderate	1000	48	LD	21	51.4
10	CaCl	High	Naive	5	LD	21	46.6
11	NaCl	Moderate	Naive	26	LD	21	80.5
12	CaCl	High	250	84	LD	21	20.2
13	CaCl	Moderate	Naive	69	LD	21	138.5
14	CaCl	Moderate	250	38	LD	21	38.8
15	Absent	Low	1000	43	LD	21	75.8
16	NaCl	High	Naive	1	LD	21	174.2
17	CaCl	High	1000	5	LD	21	46
18	MgCl	Moderate	Naive	1	LD	21	278.1
19	NaCl	Moderate	250	14	LD	21	33.1
20	NaCl	Moderate	Naive	19	LD	21	28.7
21	CaCl	High	250	60	LD	21	49.1
22	NaCl	Moderate	1000	35	LD	21	32.4
23	MgCl	Moderate	250	61	LD	21	59.1
24	NaCl	Moderate	1000	86	LD	21	84.5
25	NaCl	High	250	2	LD	21	20.2
26	CaCl	High	1000	0	LD	21	60.6
27	NaCl	High	Naive	1	LD	21	81.8
28	MgCl	High	1000	0	LD	21	60.6
29	CaCl	Moderate	Naive	52	LD	21	28.6
30	MgCl	High	1000	3	LD	21	41.3
31	Absent	Low	Naive	104	LD	21	44.9
32	NaCl	High	Naive	0	LD	21	137.7
33	Absent	Low	250	74	LD	21	36.4
34	Absent	Low	250	31	LD	21	32.8
35	MgCl	Moderate	250	1	LD	21	373.2
36	CaCl	Moderate	250	0	LD	21	169.4
37	CaCl	High	Naive	3	LD	21	73.6
38	Absent	Low	250	75	LD	21	36.6
39	NaCl	High	1000	15	LD	21	138.4
40	MgCl	High	Naive	1	LD	21	68.7
41	CaCl	Moderate	1000	24	LD	21	55.3
42	Absent	Low	Naive	55	LD	21	47.8
43	CaCl	High	1000	3	LD	21	53.8
44	MgCl	Moderate	1000	28	LD	21	44.2
45	MgCl	High	1000	0	LD	21	67.5
46	MgCl	High	250	0	LD	21	126.2
47	MgCl	Moderate	250	26	LD	21	47
48	MgCl	High	Naive	1	LD	21	77.5
49	MgCl	High	250	15	LD	21	94
50	NaCl	Moderate	Naive	41	LD	21	53.3
51	MgCl	Moderate	Naive	74	LD	21	37.9
52	CaCl	Moderate	250	73	LD	21	30.2
53	NaCl	Moderate	Naive	3	LD	21	243.7
54	MgCl	Moderate	Naive	58	LD	21	34.6
55	Absent	Low	250	15	LD	21	66.2
56	NaCl	High	250	3	LD	21	117
57	NaCl	High	Naive	10	LD	21	32.4
58	CaCl	High	Naive	0	LD	21	57.7
59	NaCl	Moderate	1000	32	LD	21	21.4
60	CaCl	Moderate	Naive	54	LD	21	60.7
61	Absent	Low	1000	45	LD	21	47.2
62	NaCl	Moderate	250	15	LD	21	99.3
63	NaCl	Moderate	250	13	LD	21	179.1
64	CaCl	Moderate	Naive	2	LD	21	38.7
65	MgCl	High	Naive	1	LD	21	63
66	Absent	Low	1000	9	LD	21	222.3
67	MgCl	High	Naive	1	LD	21	38.4
68	NaCl	High	1000	5	LD	21	50.3
69	MgCl	Moderate	1000	47	LD	21	41
70	NaCl	High	250	5	LD	21	59.1
71	CaCl	Moderate	1000	23	LD	21	40.4
72	CaCl	High	Naive	3	LD	21	43.6
73	NaCl	High	1000	14	LD	21	140
74	MgCl	High	250	0	LD	21	51
75	MgCl	Moderate	1000	30	LD	21	81.4
76	CaCl	High	250	50	LD	21	24.7
77	CaCl	Moderate	1000	33	LD	21	74.3
78	NaCl	Moderate	250	1	LD	21	154.1
79	MgCl	Moderate	Naive	116	LD	21	22
80	MgCl	High	1000	2	LD	21	51
81	Absent	Low	Naive	190	LD	21	64.7
82	MgCl	High	250	0	LD	21	44.4
83	MgCl	Moderate	250	14	LD	21	51.3
84	NaCl	Moderate	1000	11	LD	21	31.2
1	CaCl	High	1000	45	LD	44	84.8
2	CaCl	High	250	0	LD	44	107.7
3	NaCl	High	1000	0	LD	44	196
4	MgCl	Moderate	1000	162	LD	44	85.5
5	NaCl	High	250	0	LD	44	158.2
6	Absent	Low	Naive	38	LD	44	69.5
7	Absent	Low	1000	8	LD	44	57.9
8	CaCl	Moderate	250	1	LD	44	61.1
9	CaCl	Moderate	1000	1	LD	44	82.6
10	CaCl	High	Naive	0	LD	44	175.6
11	NaCl	Moderate	Naive	0	LD	44	153.9
12	CaCl	High	250	1	LD	44	100.1
13	CaCl	Moderate	Naive	0	LD	44	129.8
14	CaCl	Moderate	250	88	LD	44	90.2
15	Absent	Low	1000	10	LD	44	53.4
16	NaCl	High	Naive	0	LD	44	84.9
17	CaCl	High	1000	0	LD	44	64.5
18	MgCl	Moderate	Naive	0	LD	44	339.1
19	NaCl	Moderate	250	12	LD	44	43.8
20	NaCl	Moderate	Naive	34	LD	44	39
21	CaCl	High	250	0	LD	44	101.9
22	NaCl	Moderate	1000	0	LD	44	112
23	MgCl	Moderate	250	186	LD	44	87.1
24	NaCl	Moderate	1000	21	LD	44	37.2
25	NaCl	High	250	2	LD	44	150.6
26	CaCl	High	1000	0	LD	44	85.5
27	NaCl	High	Naive	0	LD	44	219.9
28	MgCl	High	1000	0	LD	44	61.6
29	CaCl	Moderate	Naive	10	LD	44	93.1
30	MgCl	High	1000	0	LD	44	58.3
31	Absent	Low	Naive	0	LD	44	86.1
32	NaCl	High	Naive	0	LD	44	229.1
33	Absent	Low	250	28	LD	44	149.7
34	Absent	Low	250	100	LD	44	127.7
35	MgCl	Moderate	250	2	LD	44	372.1
36	CaCl	Moderate	250	0	LD	44	140.1
37	CaCl	High	Naive	0	LD	44	174.9
38	Absent	Low	250	55	LD	44	79
39	NaCl	High	1000	0	LD	44	267.9
40	MgCl	High	Naive	0	LD	44	65.2
41	CaCl	Moderate	1000	3	LD	44	72.7
42	Absent	Low	Naive	126	LD	44	53.1
43	CaCl	High	1000	37	LD	44	76.5
44	MgCl	Moderate	1000	38	LD	44	51.5
45	MgCl	High	1000	0	LD	44	67.9
46	MgCl	High	250	0	LD	44	227.9
47	MgCl	Moderate	250	14	LD	44	124.9
48	MgCl	High	Naive	0	LD	44	54.8
49	MgCl	High	250	0	LD	44	196.2
50	NaCl	Moderate	Naive	5	LD	44	136.1
51	MgCl	Moderate	Naive	0	LD	44	113.1
52	CaCl	Moderate	250	40	LD	44	111.9
53	NaCl	Moderate	Naive	0	LD	44	154.3
54	MgCl	Moderate	Naive	0	LD	44	152.5
55	Absent	Low	250	44	LD	44	159.6
56	NaCl	High	250	0	LD	44	257
57	NaCl	High	Naive	0	LD	44	168.8
58	CaCl	High	Naive	0	LD	44	123.1
59	NaCl	Moderate	1000	9	LD	44	90.8
60	CaCl	Moderate	Naive	20	LD	44	100.5
61	Absent	Low	1000	117	LD	44	80.6
62	NaCl	Moderate	250	264	LD	44	113.1
63	NaCl	Moderate	250	124	LD	44	168.4
64	CaCl	Moderate	Naive	24	LD	44	69.3
65	MgCl	High	Naive	1	LD	44	49.9
66	Absent	Low	1000	0	LD	44	304.4
67	MgCl	High	Naive	0	LD	44	60.4
68	NaCl	High	1000	0	LD	44	241.9
69	MgCl	Moderate	1000	80	LD	44	88
70	NaCl	High	250	1	LD	44	165
71	CaCl	Moderate	1000	1	LD	44	50.1
72	CaCl	High	Naive	0	LD	44	78.8
73	NaCl	High	1000	0	LD	44	257.5
74	MgCl	High	250	0	LD	44	76.9
75	MgCl	Moderate	1000	31	LD	44	82.3
76	CaCl	High	250	25	LD	44	61.3
77	CaCl	Moderate	1000	18	LD	44	75
78	NaCl	Moderate	250	0	LD	44	153.2
79	MgCl	Moderate	Naive	0	LD	44	57.4
80	MgCl	High	1000	0	LD	44	86.6
81	Absent	Low	Naive	112	LD	44	137.8
82	MgCl	High	250	0	LD	44	65.5
83	MgCl	Moderate	250	35	LD	44	88.7
84	NaCl	Moderate	1000	42	LD	44	93.7
1	CaCl	High	1000	260	LD	60	42.5
2	CaCl	High	250	4	LD	60	53.2
3	NaCl	High	1000	2	LD	60	220
4	MgCl	Moderate	1000	410	LD	60	97.8
5	NaCl	High	250	0	LD	60	87.3
6	Absent	Low	Naive	355	LD	60	70.3
7	Absent	Low	1000	967	LD	60	111.6
8	CaCl	Moderate	250	434	LD	60	88.2
9	CaCl	Moderate	1000	23	LD	60	108.1
10	CaCl	High	Naive	9	LD	60	159.2
11	NaCl	Moderate	Naive	1	LD	60	132.3
12	CaCl	High	250	71	LD	60	111.9
13	CaCl	Moderate	Naive	1243	LD	60	115.2
14	CaCl	Moderate	250	90	LD	60	58.2
15	Absent	Low	1000	156	LD	60	95.3
16	NaCl	High	Naive	0	LD	60	107.7
17	CaCl	High	1000	1	LD	60	109.2
18	MgCl	Moderate	Naive	2	LD	60	191.5
19	NaCl	Moderate	250	62	LD	60	56.1
20	NaCl	Moderate	Naive	44	LD	60	43.4
21	CaCl	High	250	0	LD	60	70
22	NaCl	Moderate	1000	251	LD	60	53.5
23	MgCl	Moderate	250	449	LD	60	45.2
24	NaCl	Moderate	1000	432	LD	60	32.8
25	NaCl	High	250	6	LD	60	124.9
26	CaCl	High	1000	6	LD	60	53.3
27	NaCl	High	Naive	2	LD	60	150.8
28	MgCl	High	1000	0	LD	60	31.5
29	CaCl	Moderate	Naive	138	LD	60	50.1
30	MgCl	High	1000	1	LD	60	62.4
31	Absent	Low	Naive	0	LD	60	54.5
32	NaCl	High	Naive	0	LD	60	111.3
33	Absent	Low	250	965	LD	60	87.1
34	Absent	Low	250	586	LD	60	85.1
35	MgCl	Moderate	250	0	LD	60	445.3
36	CaCl	Moderate	250	3	LD	60	186.3
37	CaCl	High	Naive	1	LD	60	101.5
38	Absent	Low	250	601	LD	60	48.8
39	NaCl	High	1000	3	LD	60	223.1
40	MgCl	High	Naive	0	LD	60	60.1
41	CaCl	Moderate	1000	8	LD	60	128.2
42	Absent	Low	Naive	174	LD	60	46.1
43	CaCl	High	1000	253	LD	60	55.7
44	MgCl	Moderate	1000	606	LD	60	32.4
45	MgCl	High	1000	1	LD	60	172.4
46	MgCl	High	250	8	LD	60	111.7
47	MgCl	Moderate	250	64	LD	60	93.5
48	MgCl	High	Naive	1	LD	60	44.4
49	MgCl	High	250	0	LD	60	230.5
50	NaCl	Moderate	Naive	536	LD	60	82.5
51	MgCl	Moderate	Naive	1	LD	60	142.5
52	CaCl	Moderate	250	256	LD	60	73.5
53	NaCl	Moderate	Naive	11	LD	60	188.6
54	MgCl	Moderate	Naive	0	LD	60	191.9
55	Absent	Low	250	288	LD	60	90.5
56	NaCl	High	250	2	LD	60	267.8
57	NaCl	High	Naive	0	LD	60	146.5
58	CaCl	High	Naive	0	LD	60	167.1
59	NaCl	Moderate	1000	853	LD	60	29.4
60	CaCl	Moderate	Naive	273	LD	60	44.6
61	Absent	Low	1000	269	LD	60	52.1
62	NaCl	Moderate	250	164	LD	60	49.9
63	NaCl	Moderate	250	1955	LD	60	198.9
64	CaCl	Moderate	Naive	148	LD	60	52.2
65	MgCl	High	Naive	5	LD	60	41
66	Absent	Low	1000	1	LD	60	152.9
67	MgCl	High	Naive	2	LD	60	49.7
68	NaCl	High	1000	3	LD	60	208.2
69	MgCl	Moderate	1000	204	LD	60	51.6
70	NaCl	High	250	0	LD	60	109.1
71	CaCl	Moderate	1000	135	LD	60	44.7
72	CaCl	High	Naive	0	LD	60	78.2
73	NaCl	High	1000	0	LD	60	155.2
74	MgCl	High	250	0	LD	60	67.8
75	MgCl	Moderate	1000	168	LD	60	22.2
76	CaCl	High	250	62	LD	60	34.4
77	CaCl	Moderate	1000	545	LD	60	49.9
78	NaCl	Moderate	250	78	LD	60	239.7
79	MgCl	Moderate	Naive	3	LD	60	70.2
80	MgCl	High	1000	0	LD	60	157.9
81	Absent	Low	Naive	231	LD	60	62.9
82	MgCl	High	250	1	LD	60	76.9
83	MgCl	Moderate	250	295	LD	60	37.3
84	NaCl	Moderate	1000	48	LD	60	33.1

## Sheet: Macroinvertebrates
Tank	Salt Type	Salt concentration	Tolerance	Amphipods	Physa snail	Helisoma snail	Observer
1	CaCl	High	1000	9	91	5	SC
2	CaCl	High	250	32	46	42	SC
3	NaCl	High	1000	3	287	5	JN
4	MgCl	Moderate	1000	24	110	15	JN
5	NaCl	High	250	12	303	5	SC
6	Control	Low	Naive	207	237	4	SC
7	Control	Low	1000	33	40	66	SC
8	CaCl	Moderate	250	8	208	106	SC
9	CaCl	Moderate	1000	47	191	43	JN
10	CaCl	High	Naive	48	83	56	LD
11	NaCl	Moderate	Naive	65	334	53	SC
12	CaCl	High	250	0	130	26	JN
13	CaCl	Moderate	Naive	69	117	11	JN
14	CaCl	Moderate	250	44	122	39	JN
15	Control	Low	1000	10	69	76	JN
16	NaCl	High	Naive	5	165	5	JN
17	CaCl	High	1000	6	137	17	JN
18	MgCl	Moderate	Naive	24	144	196	SC
19	NaCl	Moderate	250	0	142	31	SC
20	NaCl	Moderate	Naive	3	168	44	SC
21	CaCl	High	250	16	159	13	SC
22	NaCl	Moderate	1000	80	188	17	JN
23	MgCl	Moderate	250	47	165	60	SC
24	NaCl	Moderate	1000	256	380	15	SC
25	NaCl	High	250	10	205	5	JN
26	CaCl	High	1000	39	91	25	JN
27	NaCl	High	Naive	13	222	5	SC
28	MgCl	High	1000	4	37	5	JN
29	CaCl	Moderate	Naive	98	91	40	SC
30	MgCl	High	1000	0	93	15	SC
31	Control	Low	Naive	34	140	11	SC
32	NaCl	High	Naive	12	145	5	JN
33	Control	Low	250	78	149	28	SC
34	Control	Low	250	22	104	17	SC
35	MgCl	Moderate	250	93	176	168	SC
36	CaCl	Moderate	250	46	385	14	JN
37	CaCl	High	Naive	15	142	21	JN
38	Control	Low	250	182	245	5	SC
39	NaCl	High	1000	0	69	5	SC
40	MgCl	High	Naive	1	200	5	SC
41	CaCl	Moderate	1000	17	153	5	SC
42	Control	Low	Naive	76	186	15	JN
43	CaCl	High	1000	17	238	29	JN
44	MgCl	Moderate	1000	92	156	15	SC
45	MgCl	High	1000	1	221	28	SC
46	MgCl	High	250	0	132	23	LD
47	MgCl	Moderate	250	316	135	21	JN
48	MgCl	High	Naive	3	157	43	SC
49	MgCl	High	250	0	144	108	JN
50	NaCl	Moderate	Naive	202	319	20	SC
51	MgCl	Moderate	Naive	88	96	32	SC
52	CaCl	Moderate	250	87	111	5	JN
53	NaCl	Moderate	Naive	485	355	106	LD
54	MgCl	Moderate	Naive	311	3	27	LD
55	Control	Low	250	280	302	28	SC
56	NaCl	High	250	6	164	10	SC
57	NaCl	High	Naive	26	145	5	LD
58	CaCl	High	Naive	41	20	21	SC
59	NaCl	Moderate	1000	108	135	27	JN
60	CaCl	Moderate	Naive	11	163	48	SC
61	Control	Low	1000	245	292	52	LD
62	NaCl	Moderate	250	148	257	73	SC
63	NaCl	Moderate	250	527	206	9	LD
64	CaCl	Moderate	Naive	10	194	25	LD
65	MgCl	High	Naive	1	79	5	LD
66	Control	Low	1000	73	65	85	SC
67	MgCl	High	Naive	0	56	5	JN
68	NaCl	High	1000	12	123	27	JN
69	MgCl	Moderate	1000	137	212	44	JN
70	NaCl	High	250	10	97	6	JN
71	CaCl	Moderate	1000	1	88	74	SC
72	CaCl	High	Naive	7	37	15	LD
73	NaCl	High	1000	10	170	5	JN
74	MgCl	High	250	2	103	5	SC
75	MgCl	Moderate	1000	142	222	19	JN
76	CaCl	High	250	6	12	6	LD
77	CaCl	Moderate	1000	45	88	5	SC
78	NaCl	Moderate	250	82	120	83	SC
79	MgCl	Moderate	Naive	123	28	5	JN
80	MgCl	High	1000	0	176	5	SC
81	Control	Low	Naive	150	80	22	SC
82	MgCl	High	250	2	112	7	SC
83	MgCl	Moderate	250	19	220	23	SC
84	NaCl	Moderate	1000	226	348	5	LD
